# Supplementary material for: Programmable Electrofluidics for Ionic Liquid Based Neuromorphic Platform
Source: Micromachines (Basel). 2019 Jul 17;10(7):478. doi: 10.3390/mi10070478 (PMC6680446; doi:10.3390/mi10070478)
Supplement: Supplementary file 1 [file micromachines-10-00478-s001.zip]

Archive with 4 entries (4 files):
- Supplemental Information - MM.pdf
- Supplemental Video S1.mp4
- Supplemental Video S2.mp4
- Supplemental Video S3.mp4
